# Supplementary material
Source: PubMed Central journal article supplement (PMC7723818)
Supplement: NIHMS1649562-supplement-online_supplement.pdf [file NIHMS1649562-supplement-online_supplement.pdf]

**TABLE E1.** Unadjusted and adjusted associations of obesity with acute severity markers of asthma exacerbation and in-hospital mortality

| Outcomes and strata              | Obesity (95% CI)     | Nonobesity (95% CI) | Unadjusted OR (95% CI) | P value | Adjusted OR* (95% CI) | P value |
|----------------------------------|----------------------|---------------------|------------------------|---------|-----------------------|---------|
| Overall (n = 72,086)             |                      |                     |                        |         |                       |         |
| Mechanical ventilation           | 8.3% (7.9%-8.7%)     | 5.0% (4.9%-5.2%)    | 1.89 (1.76-2.03)       | <.001   | 1.77 (1.63-1.92)      | <.001   |
| Noninvasive                      | 7.2% (6.8%-7.6%)     | 3.4% (3.2%-3.5%)    | 2.53 (2.32-2.75)       | <.001   | 2.14 (1.96-2.35)      | <.001   |
| Invasive                         | 1.4% (1.3%-1.6%)     | 1.9% (1.8%-2.0%)    | 0.76 (0.66-0.87)       | <.001   | 0.88 (0.75-1.03)      | .12     |
| Hospital LOS ≥3 d                | 59.4% (58.7%-60.1%)  | 46.5% (46.1%-47.0%) | 1.65 (1.60-1.71)       | <.001   | 1.37 (1.32-1.43)      | <.001   |
| In-hospital mortality            | 0.15% (0.10%-0.21%)  | 0.16% (0.13%-0.20%) | 0.99 (0.63-1.55)       | .97     | †                     | †       |
| Age <40 y (n = 27,855)           |                      |                     |                        |         |                       |         |
| Mechanical ventilation           | 7.3% (6.6%-8.0%)     | 5.1% (4.8%-5.4%)    | 1.60 (1.41-1.80)       | <.001   | 1.61 (1.40-1.85)      | <.001   |
| Noninvasive                      | 6.0% (5.4%-6.7%)     | 3.0% (2.8%-3.2%)    | 2.28 (1.98-2.63)       | <.001   | 2.05 (1.74-2.41)      | <.001   |
| Invasive                         | 1.5% (1.2%-1.8%)     | 2.3% (2.1%-2.5%)    | 0.66 (0.52-0.84)       | .001    | 0.82 (0.63-1.07)      | .14     |
| Hospital LOS ≥3 d                | 50.1% (48.8%-51.4%)  | 38.9% (38.2%-39.5%) | 1.55 (1.46-1.64)       | <.001   | 1.30 (1.22-1.39)      | <.001   |
| In-hospital mortality            | 0.07% (0.001%-0.01%) | 0.13% (0.08%-0.18%) | 0.55 (0.19-1.62)       | .28     | †                     | †       |
| Age ≥40 y (n = 44,231)           |                      |                     |                        |         |                       |         |
| Mechanical ventilation           | 8.8% (8.3%-9.3%)     | 4.9% (4.7%-5.2%)    | 2.03 (1.86-2.22)       | <.001   | 1.85 (1.67-2.04)      | <.001   |
| Noninvasive                      | 7.7% (7.2%-8.2%)     | 3.6% (3.4%-3.8%)    | 2.56 (2.32-2.83)       | <.001   | 2.19 (1.96-2.44)      | <.001   |
| Invasive                         | 1.4% (1.2%-1.6%)     | 1.6% (1.5%-1.8%)    | 0.85 (0.71-1.02)       | .09     | 0.89 (0.72-1.09)      | .25     |
| Hospital LOS ≥3 d                | 63.9% (63.0%-64.8%)  | 51.8% (51.2%-52.3%) | 1.64 (1.57-1.71)       | <.001   | 1.40 (1.34-1.47)      | <.001   |
| In-hospital mortality            | 0.19% (0.11%-0.27%)  | 0.18% (0.14%-0.23%) | 1.09 (0.67-1.77)       | .74     | †                     | †       |
| Male (n = 21,421)‡               |                      |                     |                        |         |                       |         |
| Mechanical ventilation           | 11.3% (10.2%-12.3%)  | 6.5% (6.1%-6.8%)    | 2.00 (1.76-2.26)       | <.001   | 1.71 (1.48-1.97)      | <.001   |
| Noninvasive                      | 10.2% (9.3%-11.2%)   | 4.2% (3.9%-4.5%)    | 2.93 (2.54-3.37)       | <.001   | 2.25 (1.92-2.63)      | <.001   |
| Invasive                         | 1.3% (1.0%-1.7%)     | 2.6% (2.4%-2.8%)    | 0.50 (0.36-0.68)       | <.001   | 0.53 (0.37-0.76)      | <.001   |
| Hospital LOS ≥3 d                | 55.6% (54.0%-57.2%)  | 42.0% (41.3%-42.8%) | 1.67 (1.55-1.79)       | <.001   | 1.36 (1.25-1.47)      | <.001   |
| In-hospital mortality            | 0.25% (0.17%-0.32%)  | 0.25% (0.09%-0.41%) | 1.01 (0.49-2.08)       | .98     | †                     | †       |
| Female (n = 50,384)‡             |                      |                     |                        |         |                       |         |
| Mechanical ventilation           | 7.5% (7.1%-8.0%)     | 4.3% (4.1%-4.5%)    | 1.96 (1.80-2.14)       | <.001   | 1.79 (1.63-1.97)      | <.001   |
| Noninvasive                      | 6.4% (6.0%-6.8%)     | 3.0% (2.8%-3.1%)    | 2.49 (2.25-2.76)       | <.001   | 2.09 (1.87-2.33)      | <.001   |
| Invasive                         | 1.5% (1.3%-1.7%)     | 1.6% (1.5%-1.7%)    | 0.93 (0.79-1.09)       | .367    | 1.04 (0.86-1.25)      | .71     |
| Hospital LOS ≥3 d                | 60.4% (59.6%-61.3%)  | 48.9% (48.4%-49.4%) | 1.59 (1.52-1.65)       | <.001   | 1.37 (1.31-1.44)      | <.001   |
| In-hospital mortality            | 0.12% (0.09%-0.16%)  | 0.13% (0.07%-0.19%) | 1.10 (0.63-1.93)       | .74     | †                     | †       |
| Non-Hispanic white (n = 30,866)§ |                      |                     |                        |         |                       |         |
| Mechanical ventilation           | 6.8% (6.3%-7.4%)     | 4.3% (4.1%-4.6%)    | 1.63 (1.46-1.82)       | <.001   | 1.54 (1.36-1.75)      | <.001   |
| Noninvasive                      | 5.7% (5.2%-6.2%)     | 2.7% (2.5%-2.9%)    | 2.20 (1.93-2.50)       | <.001   | 1.92 (1.66-2.22)      | <.001   |
| Invasive                         | 1.4% (1.2%-1.7%)     | 1.9% (1.7%-2.0%)    | 0.75 (0.60-0.93)       | .01     | 0.81 (0.63-1.04)      | .10     |
| Hospital LOS ≥3 d                | 62.1% (61.0%-63.1%)  | 50.0% (49.4%-50.7%) | 1.64 (1.56-1.73)       | <.001   | 1.40 (1.32-1.49)      | <.001   |
| In-hospital mortality            | 0.11% (0.06%-0.20%)  | 0.13% (0.09%-0.22%) | 0.88 (0.42-1.86)       | .74     | †                     | †       |
| Non-Hispanic black (n = 19,308)§ |                      |                     |                        |         |                       |         |
| Mechanical ventilation           | 10.3% (9.5%-11.2%)   | 5.9% (5.5%-6.2%)    | 2.03 (1.79-2.29)       | <.001   | 1.81 (1.57-2.08)      | <.001   |
| Noninvasive                      | 9.2% (8.4%-10.0%)    | 4.1% (3.8%-4.5%)    | 2.66 (2.31-3.06)       | <.001   | 2.22 (1.89-2.60)      | <.001   |
| Invasive                         | 1.5% (1.2%-1.8%)     | 2.0% (1.8%-2.3%)    | 0.73 (0.56-0.95)       | .02     | 0.78 (0.58-1.05)      | .11     |
| Hospital LOS ≥3 d                | 57.4% (56.1%-58.8%)  | 43.8% (43.0%-44.6%) | 1.68 (1.58-1.79)       | <.001   | 1.31 (1.22-1.41)      | <.001   |
| In-hospital mortality            | 0.17% (0.09%-0.33%)  | 0.19% (0.13%-0.28%) | 0.91 (0.42-1.94)       | .80     | †                     | †       |
| Hispanic (n = 14,080)§           |                      |                     |                        |         |                       |         |
| Mechanical ventilation           | 8.4% (7.5%-9.4%)     | 4.2% (3.9%-4.6%)    | 2.27 (1.94-2.27)       | <.001   | 2.02 (1.68-2.43)      | <.001   |
| Noninvasive                      | 7.5% (6.6%-8.4%)     | 3.0% (2.7%-3.4%)    | 2.88 (2.39-3.46)       | <.001   | 2.42 (1.97-2.97)      | <.001   |
| Invasive                         | 1.2% (0.9%-1.7%)     | 1.5% (1.3%-1.8%)    | 0.85 (0.60-1.19)       | .34     | 0.82 (0.55-1.22)      | .32     |
| Hospital LOS ≥3 d                | 59.1% (57.4%-60.8%)  | 45.3% (44.4%-46.3%) | 1.75 (1.61-1.89)       | <.001   | 1.45 (1.33-1.59)      | <.001   |
| In-hospital mortality            | 0.15% (0.06%-0.37%)  | 0.17% (0.11%-0.26%) | 0.94 (0.35-2.57)       | .91     | †                     | †       |

Unadjusted and adjusted logistic regression models to account for patient clustering within hospitals.

\*Adjusted for age, sex, race/ethnicity, primary insurance, quartiles for household income, residential status, patient comorbidities, hospital state, and calendar year.

†Adjusted models were not constructed because of the relatively small number of in-hospital mortality (n = 116).

‡Two hundred eighty-one patients were excluded because sex variable was missing.

§The other races (Asian, Pacific Islander, and Native American) were excluded in this analysis because of the few number.

**TABLE E2.** Interactions of obesity with age, sex, and race/ethnicity

| <b>Interaction term and outcomes</b> | <b><i>P</i> value for interactions</b> |
|--------------------------------------|----------------------------------------|
| <b>Obesity × Age</b>                 |                                        |
| Mechanical ventilation               | .03                                    |
| Noninvasive                          | .15                                    |
| Invasive                             | .85                                    |
| Hospital LOS ≥3 d                    | .03                                    |
| In-hospital mortality                | .06                                    |
| <b>Obesity × Sex</b>                 |                                        |
| Mechanical ventilation               | .71                                    |
| Noninvasive                          | .32                                    |
| Invasive                             | .001                                   |
| Hospital LOS ≥3 d                    | .80                                    |
| In-hospital mortality                | .61                                    |
| <b>Obesity × Race/ethnicity</b>      |                                        |
| Mechanical ventilation               | .12                                    |
| Noninvasive                          | .31                                    |
| Invasive                             | .72                                    |
| Hospital LOS ≥3 d                    | .63                                    |
| In-hospital mortality                | .92                                    |

Adjusted for age, sex, race/ethnicity, primary insurance, quartiles for household income, residential status, patient comorbidities, hospital state, and calendar year as well as each of the interaction terms.

**TABLE E3.** Unadjusted and adjusted associations of obesity with acute severity markers of asthma exacerbation and in-hospital mortality, according to the estimated median household income and patient residence

| Outcomes and strata                                               | Obesity (95% CI)    | Nonobesity (95% CI) | Unadjusted OR (95% CI) | P value | Adjusted OR* (95% CI) | P value |
|-------------------------------------------------------------------|---------------------|---------------------|------------------------|---------|-----------------------|---------|
| <b>Median household income quartile 1 (lowest) (n = 26,329)†</b>  |                     |                     |                        |         |                       |         |
| Mechanical ventilation                                            | 8.6% (7.9%-9.2%)    | 5.2% (4.9%-5.6%)    | 1.88 (1.67-2.10)       | <.001   | 1.74 (1.53-1.99)      | <.001   |
| Noninvasive                                                       | 7.4% (6.8%-8.1%)    | 3.6% (3.4%-3.9%)    | 2.48 (2.17-2.84)       | <.001   | 2.17 (1.87-2.52)      | <.001   |
| Invasive                                                          | 1.5% (1.3%-1.8%)    | 1.9% (1.7%-2.1%)    | 0.80 (0.64-1.00)       | .05     | 0.84 (0.65-1.09)      | .19     |
| Hospital LOS ≥3 d                                                 | 59.4% (58.3%-60.6%) | 45.8% (45.1%-46.5%) | 1.68 (1.59-1.77)       | <.001   | 1.40 (1.32-1.49)      | <.001   |
| In-hospital mortality                                             | 0.18% (0.11%-0.32%) | 0.20% (0.15%-0.28%) | 0.93 (0.48-1.81)       | .83     | ‡                     | ‡       |
| <b>Median household income quartile 2 (n = 16,852)†</b>           |                     |                     |                        |         |                       |         |
| Mechanical ventilation                                            | 7.2% (6.4%-8.0%)    | 4.5% (4.2%-4.9%)    | 1.65 (1.43-1.92)       | <.001   | 1.61 (1.36-1.91)      | <.001   |
| Noninvasive                                                       | 6.1% (5.4%-6.9%)    | 3.0% (2.7%-3.3%)    | 2.19 (1.85-2.59)       | <.001   | 1.91 (1.57-2.31)      | <.001   |
| Invasive                                                          | 1.2% (0.9%-1.6%)    | 1.9% (1.6%-2.1%)    | 0.65 (0.48-0.88)       | .01     | 0.76 (0.52-1.09)      | .14     |
| Hospital LOS ≥3 d                                                 | 59.2% (57.7%-60.7%) | 47.2% (46.4%-48.1%) | 1.63 (1.51-1.75)       | <.001   | 1.33 (1.23-1.44)      | <.001   |
| In-hospital mortality                                             | 0.19% (0.09%-0.38%) | 0.14% (0.09%-0.23%) | 1.47 (0.63-3.41)       | .37     | ‡                     | ‡       |
| <b>Median household income quartile 3 (n = 14,860)†</b>           |                     |                     |                        |         |                       |         |
| Mechanical ventilation                                            | 7.7% (6.8%-8.6%)    | 4.8% (4.4%-5.2%)    | 1.75 (1.50-2.04)       | <.001   | 1.62 (1.36-1.93)      | <.001   |
| Noninvasive                                                       | 6.4% (5.6%-7.2%)    | 3.3% (3.0%-3.6%)    | 2.20 (1.84-2.62)       | <.001   | 1.89 (1.55-2.29)      | <.001   |
| Invasive                                                          | 1.5% (1.2%-2.0%)    | 1.8% (1.6%-2.1%)    | 0.85 (0.63-1.16)       | .31     | 0.91 (0.64-1.29)      | .58     |
| Hospital LOS ≥3 d                                                 | 59.7% (58.1%-61.3%) | 47.7% (46.8%-48.6%) | 1.64 (1.52-1.77)       | <.001   | 1.39 (1.28-1.52)      | <.001   |
| In-hospital mortality                                             | 0.08% (0.03%-0.26%) | 0.14% (0.09%-0.23%) | 0.58 (0.17-1.597)      | .39     | ‡                     | ‡       |
| <b>Median household income quartile 4 (highest) (n = 10,065)†</b> |                     |                     |                        |         |                       |         |
| Mechanical ventilation                                            | 8.4% (7.3%-9.6%)    | 4.5% (4.1%-5.0%)    | 2.04 (1.69-2.46)       | <.001   | 2.03 (1.64-2.51)      | <.001   |
| Noninvasive                                                       | 7.3% (6.3%-8.5%)    | 2.7% (2.4%-3.1%)    | 3.01 (2.41-3.75)       | <.001   | 2.73 (2.14-3.48)      | <.001   |
| Invasive                                                          | 1.5% (1.0%-2.1%)    | 2.1% (1.8%-2.4%)    | 0.71 (0.48-1.05)       | .083    | 0.76 (0.49-1.18)      | .23     |
| Hospital LOS ≥3 d                                                 | 62.2% (60.1%-64.2%) | 49.4% (48.3%-50.5%) | 1.72 (1.56-1.90)       | <.001   | 1.43 (1.29-1.59)      | <.001   |
| In-hospital mortality                                             | 0.09% (0.02%-0.37%) | 0.11% (0.06%-0.22%) | 0.80 (0.18-3.65)       | .78     | ‡                     | ‡       |
| <b>Metropolitan residents (n = 66,516)</b>                        |                     |                     |                        |         |                       |         |
| Mechanical ventilation                                            | 8.4% (8.0%-8.9%)    | 5.1% (4.9%-5.3%)    | 1.89 (1.76-2.03)       | <.001   | 1.74 (1.60-1.89)      | <.001   |
| Noninvasive                                                       | 7.3% (6.9%-7.7%)    | 3.5% (3.3%-3.6%)    | 2.52 (2.32-2.75)       | <.001   | 2.12 (1.93-2.33)      | <.001   |
| Invasive                                                          | 1.4% (1.3%-1.6%)    | 1.9% (1.8%-2.1%)    | 0.75 (0.65-0.87)       | <.001   | 0.85 (0.72-1.00)      | .048    |
| Hospital LOS ≥3 d                                                 | 59.6% (58.8%-60.3%) | 46.4% (46.0%-46.9%) | 1.67 (1.62-1.74)       | <.001   | 1.39 (1.33-1.47)      | <.001   |
| In-hospital mortality                                             | 0.16% (0.11%-0.24%) | 0.17% (0.14%-0.21%) | 1.01 (0.65-1.58)       | .06     | ‡                     | ‡       |
| <b>Nonmetropolitan residents (n = 5,570)</b>                      |                     |                     |                        |         |                       |         |
| Mechanical ventilation                                            | 6.6% (5.4%-8.1%)    | 3.5% (2.9%-4.0%)    | 1.80 (1.34-2.40)       | <.001   | 1.94 (1.38-2.74)      | <.001   |
| Noninvasive                                                       | 5.0% (4.0%-6.3%)    | 2.0% (1.6%-2.4%)    | 2.37 (1.66-3.38)       | <.001   | 2.36 (1.55-3.58)      | <.001   |
| Invasive                                                          | 1.6% (1.1%-2.4%)    | 1.7% (1.3%-2.1%)    | 0.91 (0.54-1.53)       | .73     | 1.16 (0.63-2.12)      | .63     |
| Hospital LOS ≥3 d                                                 | 58.4% (55.8%-61.0%) | 46.3% (44.8%-47.8%) | 1.58 (1.39-1.80)       | <.001   | 1.26 (1.08-1.46)      | .003    |
| In-hospital mortality                                             | 0                   | 0.11% (0.05%-0.29%) | —                      | —       | ‡                     | ‡       |

Unadjusted and adjusted logistic regression models to account for patient clustering within hospitals.

\*Adjusted for age, sex, race/ethnicity, primary insurance, quartiles for household income, residential status, patient comorbidities, hospital state, and calendar year.

†Three thousand nine hundred eighty patients were excluded because the patient residence variable was missing.

‡Adjusted models were not constructed because of the relatively small number of in-hospital mortality (n = 116).

**TABLE E4.** Unadjusted and adjusted associations of obesity with hospital LOS among patients hospitalized with asthma exacerbation

| Strata       | Obesity hospital LOS (d), median (IQR) | Nonobesity hospital LOS (d), median (IQR) | Unadjusted % increase in hospital LOS compared with nonobesity (95% CI)* | P value | Adjusted % increase in hospital LOS compared with nonobesity (95% CI)* | P value |
|--------------|----------------------------------------|-------------------------------------------|--------------------------------------------------------------------------|---------|------------------------------------------------------------------------|---------|
| Overall      | 3 (2-5)                                | 2 (1-4)                                   | 24% (22%-27%)                                                            | <.001   | 13% (11%-16%)                                                          | <.001   |
| Age category |                                        |                                           |                                                                          |         |                                                                        |         |
| <40 y        | 3 (2-4)                                | 2 (1-3)                                   | 20% (16%-25%)                                                            | <.001   | 11% (7%-15%)                                                           | <.001   |
| ≥40 y        | 3 (2-5)                                | 2 (2-4)                                   | 23% (20%-26%)                                                            | <.001   | 14% (11%-17%)                                                          | <.001   |
| Sex          |                                        |                                           |                                                                          |         |                                                                        |         |
| Male         | 3 (2-4)                                | 2 (1-3)                                   | 26% (21%-31%)                                                            | <.001   | 14% (8%-19%)                                                           | <.001   |
| Female       | 3 (2-5)                                | 2 (2-4)                                   | 22% (20%-25%)                                                            | <.001   | 13% (10%-16%)                                                          | <.001   |

IQR, Interquartile range.

Unadjusted and adjusted negative binomial regression models using generalized estimating equations to account for patient clustering within hospitals.

\*Adjusted for age, sex, race/ethnicity, primary insurance, quartiles for household income, residential status, patient comorbidities, hospital state, and calendar year.

**TABLE E5.** Associations of obesity with acute severity markers of asthma exacerbation and in-hospital death using stabilized IPW method

| Outcomes               | OR (95% CI)      | P value |
|------------------------|------------------|---------|
| Mechanical ventilation | 1.70 (1.54-1.87) | <.001   |
| Noninvasive            | 2.08 (1.85-2.32) | <.001   |
| Invasive               | 0.85 (0.72-1.00) | .055    |
| Hospital LOS ≥3 d      | 1.36 (1.30-1.43) | <.001   |
| In-hospital mortality  | 0.95 (0.57-1.59) | .86     |

IPW was calculated by using age, sex, race/ethnicity, primary insurance, quartiles for household income, residential status, patient comorbidities, hospital state, and calendar year.
